# Supplementary material for: Molecular Identification of Endophytic Fungi and Their Pathogenicity Evaluation Against Dendrobium nobile and Dendrobium officinale
Source: MDPI journal article supplement (doi:10.3390/ijms21010316), 2020-01-02
Supplement: s1 [file s1]

**Table S1.** Growth conditions, and colony and morphological characteristics of isolated from wild *Dendrobium nobile* and re-isolated endophytic fungus after pathogenicity experiment.

| Isolate name                       | Code | Host part for isolation      | Host part for re-isolation                                | Media | Growth conditions | Colony diameter (mm, after 5 days) | Key colony characteristics           |                                                        |                                                 | Key microscopic characteristics                                                                                                                                                                                                          |
|------------------------------------|------|------------------------------|-----------------------------------------------------------|-------|-------------------|------------------------------------|--------------------------------------|--------------------------------------------------------|-------------------------------------------------|------------------------------------------------------------------------------------------------------------------------------------------------------------------------------------------------------------------------------------------|
|                                    |      |                              |                                                           |       |                   |                                    | Surface                              | Color                                                  | Margin                                          |                                                                                                                                                                                                                                          |
| <i>Colletotrichum tropicicola</i>  | ZF01 | Wild <i>D. nobile</i> leaves | <i>D. nobile</i> and <i>D. officinale</i> seedling leaves | PDA   | 25 °C for 5 days  | 32 ± 0.2                           | Flat, white, buff cottony            | Whitish to grey/orange                                 | Irregular margin mycelium                       | Sclerotia absent, conidiogenous cells hyaline to pale brown, conidia hyaline with round ends, smooth-walled                                                                                                                              |
| <i>Fusarium keratoplasticum</i>    | ZF02 | Wild <i>D. nobile</i> leaves |                                                           |       |                   | 16 ± 0.2                           | Flat velvety                         | White with no diffusing pigment color                  | Irregular white rims mycelia                    | Microconidia oval and elongated and clavate, sickle-shaped conidia containing numerous septations, septate hyaline hyphae                                                                                                                |
| <i>Fusarium oxysporum</i>          | ZF03 | Wild <i>D. nobile</i> leaves |                                                           |       |                   | 25 ± 0.2                           | Cottony white to light violet colony | White to white-violet                                  | Aerial white margins                            | Septate and hyaline, Macroconidia slightly curved and thick with an attenuated apical cell, 3 to 5 septa, short aerial conidiophores, unbranched, microconidia non-septate, aerial conidia, ellipsoidal to cylindrical, slightly curved, |
| <i>Fusarium solani</i>             | ZF04 | Wild <i>D. nobile</i> leaves |                                                           |       |                   | 28 ± 0.2                           | Cottony white to light yellow colony | White with creamy to white-greyish, light yellow color | Irregular white margins with cream yellow edges | Long and narrow macroconidia, cylindrical, dorsal and ventral surface parallel, 3 to 5 septa, phyalide long and thin                                                                                                                     |
| <i>Trichoderma longibrachiatum</i> | ZF05 | Wild <i>D. nobile</i> leaves |                                                           |       |                   | 34 ± 0.2                           | Cottony off white to greenish        | Off white color, later green tufts sporulation         | Irregular white margins                         | Very hyaline hyphae, long conidiophores, flask-shaped single phialides, small-walled ellipsoidal conidia, formed chlamydospores (smooth                                                                                                  |

Note: Values are presented as means ± SD; PDA, potato dextrose agar

**Table S2.** Primer sequences and PCR conditions for amplification of internal transcribed spacer region.

| Primer | Length | Sequence (5' to 3')    | PCR conditions          |
|--------|--------|------------------------|-------------------------|
| ITS 4  | 20     | TCCTCCGCTTATTGATATGC   | 95°C for 30 s           |
| ITS 5  | 22     | GGAAGTAAAAGTCGTAACAAGG | 58°C for 30 s 35 Cycles |
|        |        |                        | 72°C for 40 s           |

Note: s: Seconds; ITS: internal transcribed spacer
